# Supplementary material
Source: HighWire-hosted journal article supplement (https://ard.bmj.com/content/79/1/132)
Supplement: inline-supplementary-material-1 [file inline-supplementary-material-1.pdf]

## 1 SUPPLEMENTARY METHODS

### 2 Subject Recruitment

3 Clinical information was recorded for all patients, including demographic information (gender, age,  
4 smoking status and BMI), disease duration, *HLA-B27* carriage, sulfasalazine and TNFi treatment  
5 information, the Bath Ankylosing Spondylitis Disease Activity Index (BASDAI) (1) and Bath Ankylosing  
6 Spondylitis Functional Index (BASFI) (1), and clinical manifestations (inflammatory back pain, uveitis,  
7 axial arthritis, peripheral arthritis, ulcerative colitis, Crohns disease, enthesitis, dactylitis and  
8 psoriasis). Dietary habits were assessed by a 52-question questionnaire to exclude subjects with  
9 special dietary habits such as an entirely plant-based or meat-based diet. A summary of the cohort  
10 characteristics is available in Supplementary Table 1.

11

### 12 Shotgun metagenome sequencing

13 Faecal samples were collected and stored at  $-80^{\circ}\text{C}$  prior to DNA extraction. DNA was extracted using  
14 a StoolGen DNA kit (CWBiotech Co., Beijing, China). DNA concentrations were determined using a  
15 Qubit dsDNA BR assay kit (Thermo Fisher, Foster City, CA, USA). 200 – 500 bp insert size libraries were  
16 constructed using a TruSeq DNA Sample Preparation Kit (Illumina, San Diego, CA, USA) and an  
17 automated SPRI-Works system (Beckman Coulter, San Jose, CA, USA), Quality Control (QC) of each  
18 library was carried out using an Agilent 2100 Bioanalyzer (Agilent Technologies, Santa Clara, CA, USA),  
19 Qubit dsDNA BR assay kit (Thermo Fisher, Foster City, CA, USA) and a KAPA qPCR MasterMix plus  
20 Primer Premix kit (Kapa Biosystems, Woburn, MA, USA) according to the manufacturer's instructions.  
21 Libraries that passed QC ( $>3\text{ ng}/\mu\text{L}$ ) were sequenced.

22

### 23 Microbiome Sequence Analysis

24 Abundance tables were arcsine square root transformed prior to analysis. Multidimensional data  
25 visualisation was conducted using a sparse partial least squares discriminant analysis (sPLSDA) as  
26 implemented in R as part of the MixOmics package v6.3.1 (5), at the species level using Bray-Curtis

27 distance matrices. Receiver operating characteristic curve was calculated using sPLSDA and cross-  
28 validation of the combined discovery and validation cohorts using the MixOmics package v6.3.1.  
29 Multivariate association of the bacterial species composition with sources of covariation was  
30 investigated using a PERMANOVA test (10000 permutations) as part of vegan v2.4-5 (6). Gender, BMI,  
31 age and smoking status were found to exhibit significant associations and were subsequently included  
32 as covariates in the downstream multivariate and univariate statistical models. Multivariate  
33 association of bacterial species composition with AS status and TNFi treatment was conducted using  
34 PERMANOVA (10000 permutations). Univariate association of bacterial species and functional  
35 pathways/groups were tested for significance using MaAsLin v0.0.5, using default parameters which  
36 includes Benjamini-Hochberg correction (7), and Wilcoxon rank-sum tests as implemented in R (8).  
37 Only results which were significant in both tests ( $P < 0.05$ ) were reported in the main text. The alpha  
38 diversity of bacterial species was calculated using the rarefy function, as implemented in vegan v2.4-  
39 5. For measurement of microbial epitope richness, the Shannon, Simpson and Chao diversity indices  
40 were measured (vegan v2.4-5) and group differences were evaluated using Wilcoxon rank-sum tests.  
41 Genetic-relatedness dendrograms for strain-level results from PanPhlAn were calculated using Jaccard  
42 distance matrices and hierarchical clustering as implemented in R v.3.5.2.

43

#### 44 **T-cell responses to HLA-B27 presented bacterial peptides**

##### 45 **Synthetic Peptides**

46 All peptides were synthesized by SBSGene (Shanghai, China). The peptides were dissolved in DMSO  
47 for further use.

48

##### 49 **Study Subjects**

50 Peripheral blood mononuclear cells (PBMCs) of AS patients and healthy donors were obtained from  
51 the Department of Rheumatology and Immunology of Shanghai Changzheng Hospital (Shanghai,  
52 China). The samples were stored in liquid nitrogen until use. All participants in the study have signed

53 an informed consent form. Ethical approval was obtained from the Ethics Committee of Shanghai  
54 Changzheng Hospital.

55

#### 56 **Generation of EBV-transformed B-LCLs**

57 PBMCs (approximately  $10^7$  cells) separated from AS patients were suspended in 5ml RF-10 (RPMI-1640  
58 supplemented with 10% FCS, 2mM L-glutamine,  $5 \times 10^{-5}$ M 2-ME, 100U/ml penicillin and 100 U/ml  
59 streptomycin, Gibco) with the presence of FK-506 (20nM, InvivoGen). Then 5ml supernatant of B95-8  
60 cell culture was added into the cells. The cells were cultured in a 37°C, 5% CO<sub>2</sub> incubator. The growth  
61 of B lymphoblastic clumps could be seen after 3-6 days transformation. Transformed B-LCLs were sent  
62 for HLA-B analysing and stored in liquid nitrogen for further using.

63

#### 64 **Generation of antigen-specific CD8+ T cells**

65 For the primary stimulation, a total number of  $10^7$  PBMCs of an individual patient or healthy donor  
66 were separated into two parts to generate two T cell culture. In one culture,  $4.5 \times 10^6$  of the cells (in  
67 1ml RF-10) were put in 24-well tissue culture plate, from which  $0.5 \times 10^6$  of the cells were divided into  
68 eight parts and each part was pulsed with a single peptide ( $10^{-6}$  mmol/L) in 200  $\mu$ L RF-10 for 1 hour  
69 (peptides listed in Supplementary Table 9). These 8 parts were combined, washed with PBS, and then  
70 added into the original cells, and cultured in RF-10 with the presence of 20 IU/ml recombinant human  
71 interleukin-2 (rIL-2) (Peprotech, Brisbane, QLD, Australia).

72

73 Before re-stimulation, CD4+ T cells were depleted with magnetic beads (Dynabeads CD4, Invitrogen,  
74 USA). Autologous B cell lymphoblastoid cell lines (B-LCLs) were used as antigen presentation cells  
75 (APC) for re-stimulation. The B-LCLs (10 percent of the total cell number) were irradiated and divided  
76 into eight parts to pulse with a single peptide individually, then added to the culture plate as described  
77 above.

78

**79 Assessing antigen-specific CD8+ T cell functions**

80 Nine days after restimulation, an intracellular cytokine staining (ICS) was performed to assess antigen-  
81 specific CD8+ T cells. For identification of each peptide,  $10^5$  cells and a test peptide ( $10^{-6}$  mmol/L) were  
82 plated into U-bottom 96-well plate with  $10^5$  autologous B-LCLs added. Then, the cells were incubated  
83 in 37°C and 5% CO<sub>2</sub> for 5h with the presence of Brefeldin A (BFA) (Sigma) before ICS. Fluorescent anti-  
84 CD4, anti-CD8 and anti-IFN- $\gamma$  antibodies (BD) were used to identify the specific CD8+ T cells.

85

86

**87 Supplementary References**

- 88 1. Garrett S, Jenkinson T, Kennedy LG, Whitelock H, Gaisford P, Calin A. A new approach to  
89 defining disease status in ankylosing spondylitis: the Bath Ankylosing Spondylitis Disease Activity  
90 Index. *J Rheumatol*. 1994;21(12):2286-91.
- 91 2. Das S, Forer L, Schönherr S, Sidore C, Locke AE, Kwong A, et al. Next-generation genotype  
92 imputation service and methods. *Nature genetics*. 2016;48(10):1284.
- 93 3. Jia X, Han B, Onengut-Gumuscu S, Chen W-M, Concannon PJ, Rich SS, et al. Imputing amino  
94 acid polymorphisms in human leukocyte antigens. *PloS one*. 2013;8(6):e64683.
- 95 4. Rentería ME, Cortes A, Medland SE. Using PLINK for genome-wide association studies  
96 (GWAS) and data analysis. *Genome-Wide Association Studies and Genomic Prediction: Springer*;  
97 2013. p. 193-213.
- 98 5. Lê Cao K-A, Costello M-E, Lakis VA, Bartolo F, Chua X-Y, Brazeilles R, et al. MixMC: a  
99 multivariate statistical framework to gain insight into microbial communities. *PloS one*.  
100 2016;11(8):e0160169.
- 101 6. Dixon P. VEGAN, a package of R functions for community ecology. *Journal of Vegetation*  
102 *Science*. 2003;14(6):927-30.
- 103 7. Morgan XC, Tickle TL, Sokol H, Gevers D, Devaney KL, Ward DV, et al. Dysfunction of the  
104 intestinal microbiome in inflammatory bowel disease and treatment. *Genome biology*.  
105 2012;13(9):R79.
- 106 8. Ihaka R, Gentleman R. R: a language for data analysis and graphics. *Journal of computational*  
107 *and graphical statistics*. 1996;5(3):299-314.

108
